# Supplementary material
Source: PubMed Central journal article supplement (PMC6659159)
Supplement: jamaotolaryngolheadnecksurg-e191752-s001.pdf [file jamaotolaryngolheadnecksurg-e191752-s001.pdf]

## Supplementary Online Content

Meltzer C, Hull M, Sundang A, Adams JL. Association between annual surgeon total thyroidectomy volume and transient and permanent complications. *JAMA Otolaryngol Head Neck Surg*. Published online July 25, 2019. doi:10.1001/jamaoto.2019.1752.

**eTable 1.** ICD-9 Codes for Comorbidities

**eTable 2.** Exploratory Analysis of Covariates

**eTable 3.** Characteristics of 10 546 Patients Receiving Total Thyroidectomies

This supplementary material has been provided by the authors to give readers additional information about their work.

**eTable 1. ICD-9 Codes for Comorbidities**

|                                       |                                                                                                        |
|---------------------------------------|--------------------------------------------------------------------------------------------------------|
| Dyspnea                               | 786.0                                                                                                  |
| Chronic obstructive pulmonary disease | 416.8,416.9, 490.*, 492.*, 494.*, 495.*, 496.*, 500.*, 502.*, 503.*, 504.*, 505.*, 506.4, 508.1, 508.8 |
| Asthma                                | 493.*                                                                                                  |
| Congestive heart failure              | 428.0                                                                                                  |
| Hypertension                          | 401.*, 997.91, 459.3*                                                                                  |
| Disseminated cancer                   | 199.*                                                                                                  |
| Steroid use                           | v87.45                                                                                                 |
| Bleeding disorders                    | 286.9, 287.9, 455.*                                                                                    |
| Chemotherapy in past 30 days          | v58.1, v07.39, v67.2, 999.81, v66.2, v07.39, v58.11, v87.41                                            |
| Radiotherapy in past 90 days          | v58.0, v66.1, v67.1, E879.2                                                                            |
| Acute myocardial infarction           | 410.*                                                                                                  |
| Stroke                                | 436.*,997.02, 431, 433.*, 434.3.*, 436, 438.*                                                          |
| Dialysis                              | 586.*, 639.3, v45.11, v56.0, v45.11, v45.12                                                            |
| Anticoagulant therapy                 | V58.61, E934.5, 964.5                                                                                  |
| Seizures                              | 345.*, 649.4, v17.2                                                                                    |
| Anxiety                               | 313, 300.*, 309.28, 309.21, 309.24, 293.84                                                             |
| Obstructive sleep apnea               | 372.2*, 780.5*                                                                                         |
| Hearing loss                          | 389.*, 388.12, 388.2                                                                                   |
| Vision impairment                     | 369.*                                                                                                  |
| Dementia                              | 290.*, 291.2, 294.1, 331.19, 331.82                                                                    |
| Hashimoto's disease                   | 245.2                                                                                                  |
| Graves' disease                       | 242.0*, 378.9*                                                                                         |
| Thyroid cancer                        | 193.*, 197.0, 194.1, 198.5, v10.87                                                                     |
| Non-toxic goiter                      | 241.0, 241.1                                                                                           |
| Primary hyperparathyroidism           | 252.01                                                                                                 |
| Pregnancy                             | V23.86, 646.7, V23.2, V22, 646.8, 643, 761.5, 633.9, 633.91                                            |

**Note:** Comorbid diabetes and depression were identified using an enterprise data repository of members with chronic conditions.

**eTable 2.** Exploratory Analysis of Covariates

| Covariate                            | Odds ratio* | P value     |
|--------------------------------------|-------------|-------------|
| S (total thyroidectomy volume)       | NA          | <b>0.00</b> |
| (Intercept)                          | 1.00        | NA          |
| Acute myocardial infarction          | 0.53        | 0.54        |
| Age                                  | 0.74        | <b>0.00</b> |
| Anticoagulant therapy                | 2.73        | <b>0.00</b> |
| Asthma                               | 1.34        | 0.41        |
| Bleeding disorders                   | 1.10        | 0.82        |
| BMI                                  | 0.98        | 0.70        |
| Charlson comorbidity Index score     | 1.01        | 0.91        |
| Chemotherapy in past 30 days         | 1.04        | 0.87        |
| Congestive heart failure             | 1.06        | 0.91        |
| COPD                                 | 0.98        | 0.84        |
| Dementia                             | 0.00        | 1.00        |
| Depression                           | 0.82        | 0.34        |
| Diabetes                             | 1.01        | 0.95        |
| Dialysis                             | 0.98        | 0.98        |
| Disseminated cancer                  | 0.84        | 0.82        |
| Distance from nearest medical office | 1.01        | 0.89        |
| DxCG score                           | 1.04        | 0.68        |
| Dyspnea                              | 1.35        | <b>0.02</b> |
| Emergency room visits (prior year)   | 1.17        | <b>0.00</b> |
| Gender                               | 0.86        | 0.17        |
| Graves' disease                      | 1.20        | 0.24        |
| Hashimoto's disease                  | 1.24        | 0.22        |
| Hearing loss                         | 0.94        | 0.79        |
| Heart failure                        | 1.18        | 0.69        |
| Hyperlipidemia                       | 0.92        | 0.82        |
| Hypertension                         | 1.03        | 0.78        |
| Inpatient encounters (prior year)    | 0.97        | 0.71        |
| Missing Charlson comorbidity score   | 0.70        | 0.30        |
| Missing race/ethnicity               | 0.00        | <b>0.00</b> |
| Missing variable group               | 2.00        | <b>0.03</b> |
| Multiple race/ethnicity              | 0.00        | <b>0.00</b> |
| Obstructive sleep apnea              | 1.02        | 0.92        |
| Office visits (prior year)           | 1.01        | <b>0.02</b> |
| Pregnancy                            | 1.18        | 0.71        |
| Radiotherapy in past 90 days         | 1.20        | 0.74        |

| <b>Covariate</b>               | <b>Odds ratio*</b> | <b>P value</b> |
|--------------------------------|--------------------|----------------|
| Race/ethnicity                 |                    |                |
| American Indian/Alaskan Native | 0.00               | <b>0.00</b>    |
| Asian/Pacific Islander         | 0.00               | <b>0.00</b>    |
| Black                          | 0.00               | <b>0.00</b>    |
| Hispanic                       | 0.00               | <b>0.00</b>    |
| White                          | 0.00               | <b>0.00</b>    |
| Seizures                       | 1.38               | 0.45           |
| Steroid use                    | 1.26               | 0.71           |
| Stroke                         | 0.56               | 0.16           |
| Surgery in Southern California | 0.50               | <b>0.00</b>    |
| Thyroid cancer                 | 1.59               | <b>0.00</b>    |
| Visual impairment              | 1.41               | 0.58           |
| Year                           | 1.08               | <b>0.00</b>    |

\*\* for a one-unit change in the outcome

**eTable 3.** Characteristics of 10 546 Patients Receiving Total Thyroidectomies

|                                                               |           |
|---------------------------------------------------------------|-----------|
| Age in years, no. (%)                                         |           |
| <18                                                           | 97 (1)    |
| 18-44                                                         | 3432 (33) |
| 45-64                                                         | 4877 (46) |
| ≥65                                                           | 2140 (20) |
| Males, no. (%)                                                |           |
| 8500 (81)                                                     |           |
| Ethnicity, no. (%)                                            |           |
| American Indian/Alaskan Native                                | 25 (0)    |
| Asian/Pacific Islander                                        | 1694 (16) |
| Black                                                         | 1534 (15) |
| Hispanic                                                      | 2564 (24) |
| Multiple                                                      | 107 (1)   |
| White                                                         | 4593 (44) |
| Distance to nearest medical office building in miles, no. (%) |           |
| < 5                                                           | 7053 (67) |
| 5 - 19.9                                                      | 3241 (31) |
| ≥ 20                                                          | 252 (2)   |
| Region, no. (%)                                               |           |
| Northern California                                           | 3939 (37) |
| Southern California                                           | 6607 (63) |
| Charlson comorbidity index, no. (%)                           |           |
| 0                                                             | 4452 (42) |
| 1-4                                                           | 4556 (44) |
| 5-9                                                           | 952 (9)   |
| ≥ 10                                                          | 270 (3)   |
| Missing                                                       | 316 (3)   |
| DxCG score, no. (%)                                           |           |
| <1                                                            | 1603 (15) |
| 1-4.99                                                        | 6867 (65) |
| ≥ 5                                                           | 1930 (18) |
| Missing                                                       | 146 (1)   |
| Surgery year, no. (%)                                         |           |
| 2008                                                          | 700 (7)   |
| 2009                                                          | 1179 (11) |
| 2010                                                          | 1388 (13) |
| 2011                                                          | 1479 (14) |
| 2012                                                          | 1476 (14) |
| 2013                                                          | 1404 (13) |
| 2014                                                          | 1481 (14) |
| 2015                                                          | 1439 (14) |
| BMI, no. (%)                                                  |           |
| < 18.5                                                        | 345 (3)   |
| 18.6 – 24.9                                                   | 2740 (26) |
| 25.0 – 29.9                                                   | 3302 (31) |
| ≥ 30.0                                                        | 4159 (39) |
| Comorbid disease, no. (%)                                     |           |
| Hashimoto's disease                                           | 483 (5)   |
| Graves disease                                                | 771 (7)   |
| Thyroid cancer                                                | 3032 (29) |
| Obstructive sleep apnea                                       | 470 (5)   |
| Visual impairment                                             | 33 (0)    |

|                                       |           |
|---------------------------------------|-----------|
| Hearing loss                          | 407 (4)   |
| Disseminated cancer                   | 24 (0)    |
| Hypertension                          | 3965 (38) |
| Chronic obstructive pulmonary disease | 1697 (16) |
| Bleeding disorders                    | 85 (1)    |
| Diabetes                              | 1266 (12) |
| Depression                            | 475 (5)   |
| Asthma                                | 98 (1)    |
| Dementia                              | 8 (0)     |
| Pregnancy                             | 57 (1)    |
| Radiotherapy within 90 days           | 53 (1)    |
| Chemotherapy within 30 days           | 383 (4)   |
| Dyspnea                               | 1170 (11) |
| Steroid medication use                | 39 (0)    |
| Anticoagulant/antiplatelet therapy    | 95 (1)    |
| Dialysis                              | 33 (0)    |
| History of AMI                        | 28 (0)    |
| Cerebrovascular disease               | 168 (2)   |
| Seizure disorder                      | 62 (1)    |
| Prior year hospitalizations           |           |
| 0                                     | 9422 (90) |
| 1-3                                   | 1088 (10) |
| >3                                    | 36 (<1)   |
| Prior year office visits              |           |
| 0-10                                  | 7025 (67) |
| 11-20                                 | 2456 (23) |
| 21-30                                 | 674 (6)   |
| 31-40                                 | 215 (2)   |
| ≥41                                   | 176 (2)   |

Abbreviations: AMI, acute myocardial infarction; BMI, body mass index
